# Supplementary material for: bITH, a blood-based metric of intratumor heterogeneity, is associated with clinical response to immune checkpoint blockade in non-small cell lung cancer
Source: PubMed Central journal article supplement — eBioMedicine. 2023 Apr 23;91:104564. doi: 10.1016/j.ebiom.2023.104564 (PMC10149223; doi:10.1016/j.ebiom.2023.104564), 2023-04-23

**a**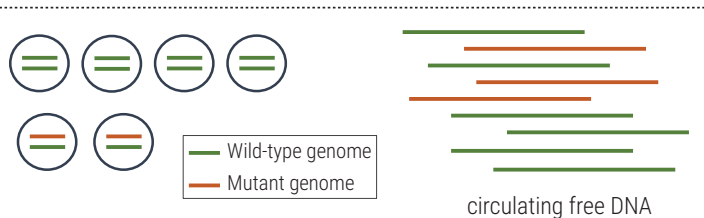**i. MCV calculation**

$$MSAF \approx \frac{ctDNA}{cfDNA} \quad MCV = \frac{VAF}{MSAF}$$

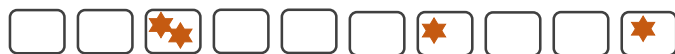**ii. MCV binning & bin-specific frequency of mutations**

$$p_i = \frac{mc_i}{\sum_{i=1}^{10} mc_i}$$

**iii. bITH calculation**

$$\varphi_i = \text{median}((i-1) * 0.1, i * 0.1)$$

$$\mathbf{bITH} = - \sum_{i=1}^n \varphi_i * P_i \ln(P_i)$$

**b**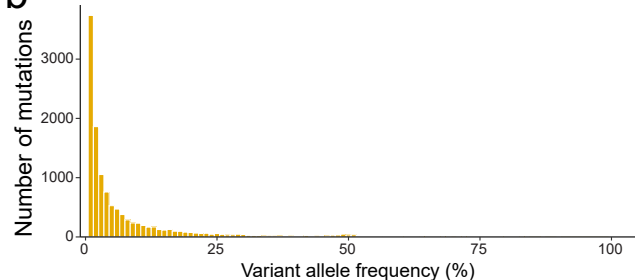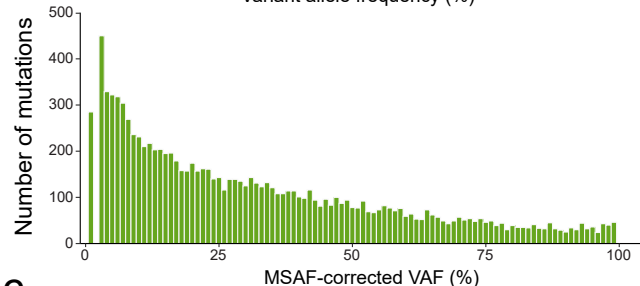**c**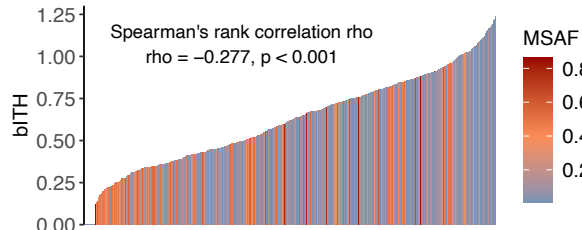**d**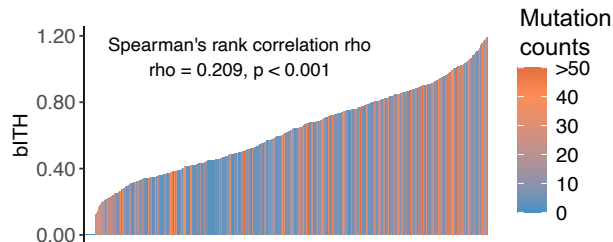

Supplement: mmc3.pdf [file mmc3.pdf]
