# Supplementary material for: bITH, a blood-based metric of intratumor heterogeneity, is associated with clinical response to immune checkpoint blockade in non-small cell lung cancer
Source: PubMed Central journal article supplement — eBioMedicine. 2023 Apr 23;91:104564. doi: 10.1016/j.ebiom.2023.104564 (PMC10149223; doi:10.1016/j.ebiom.2023.104564), 2023-04-23
Supplement: mmc6.pdf [file mmc6.pdf]

## bTMB-Low subgroup PFS

**a**

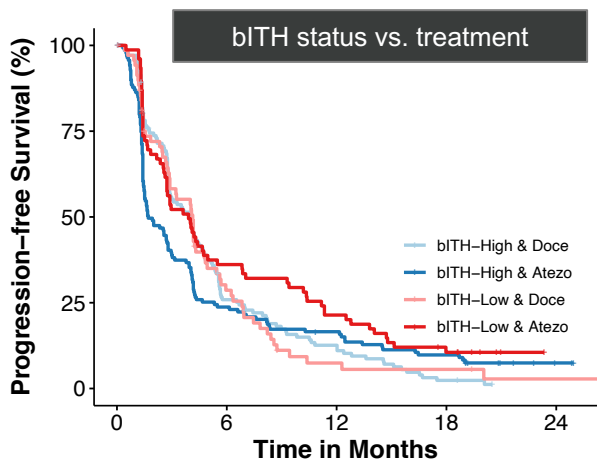

Number at risk

| Time (mo)         | 0   | 6  | 12 | 18 | 24 |
|-------------------|-----|----|----|----|----|
| bITH-High & Doce  | 138 | 34 | 16 | 3  | 0  |
| bITH-High & Atezo | 140 | 33 | 22 | 13 | 2  |
| bITH-Low & Doce   | 71  | 18 | 4  | 3  | 1  |
| bITH-Low & Atezo  | 76  | 27 | 16 | 7  | 0  |

### Predictor effect

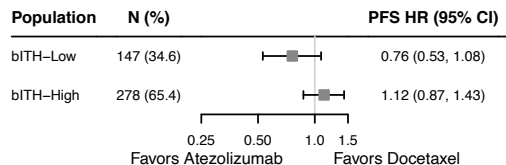

### Atezolizumab & Docetaxel Association

| Treatment    | bITH status | Median time (mo) | HR (95% CI) <i>bITH-High as ref</i> | <i>P</i> |
|--------------|-------------|------------------|-------------------------------------|----------|
| Atezolizumab | bITH-High   | 1.71             | 0.74 (0.55, 0.99)                   | 0.043    |
|              | bITH-Low    | 3.91             |                                     |          |
| Docetaxel    | bITH-High   | 4.01             | 1.03 (0.76, 1.40)                   | 0.832    |
|              | bITH-Low    | 4.14             |                                     |          |

## bTMB-High subgroup OS

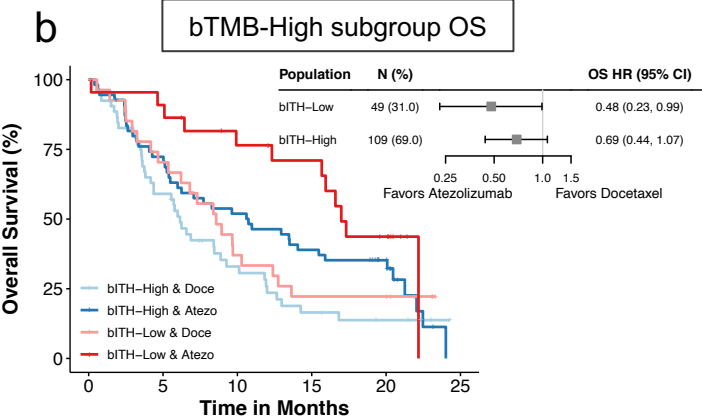

Number at risk

| Time (mo)         | 0  | 5  | 10 | 15 | 20 | 25 |
|-------------------|----|----|----|----|----|----|
| bITH-High & Doce  | 54 | 30 | 14 | 7  | 4  | 0  |
| bITH-High & Atezo | 55 | 39 | 28 | 21 | 13 | 0  |
| bITH-Low & Doce   | 27 | 19 | 10 | 6  | 6  | 0  |
| bITH-Low & Atezo  | 22 | 20 | 15 | 13 | 7  | 0  |

## bTMB-High subgroup PFS

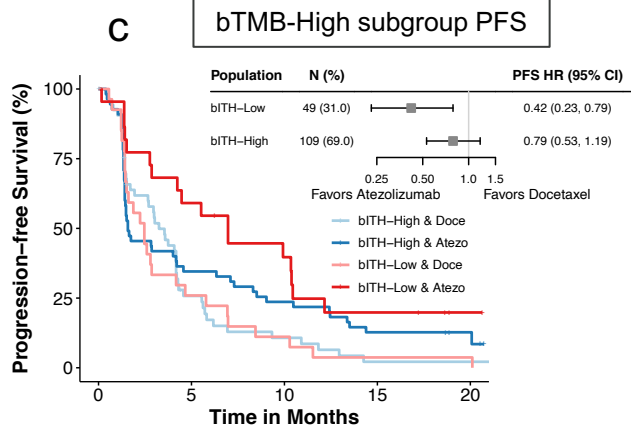

Number at risk

| Time (mo)         | 0  | 5  | 10 | 15 | 20 |
|-------------------|----|----|----|----|----|
| bITH-High & Doce  | 54 | 12 | 5  | 1  | 1  |
| bITH-High & Atezo | 55 | 19 | 13 | 7  | 3  |
| bITH-Low & Doce   | 27 | 7  | 3  | 1  | 1  |
| bITH-Low & Atezo  | 22 | 13 | 8  | 4  | 1  |
