# Supplementary figures and images for: bITH, a blood-based metric of intratumor heterogeneity, is associated with clinical response to immune checkpoint blockade in non-small cell lung cancer
Source: PubMed Central journal article supplement — eBioMedicine. 2023 Apr 23;91:104564. doi: 10.1016/j.ebiom.2023.104564 (PMC10149223; doi:10.1016/j.ebiom.2023.104564), 2023-04-23

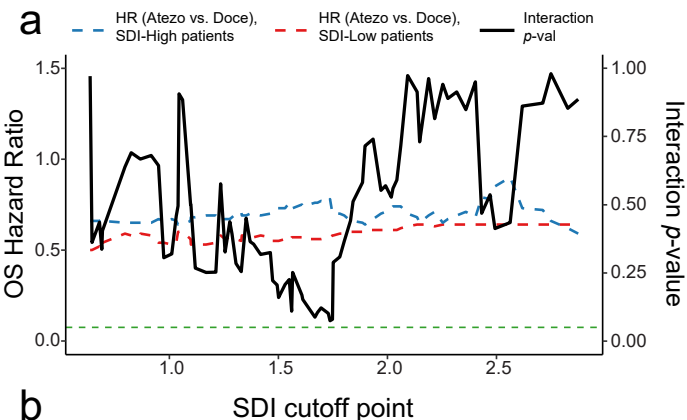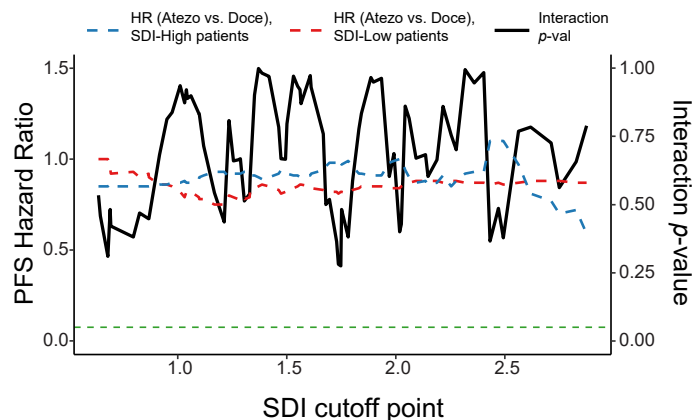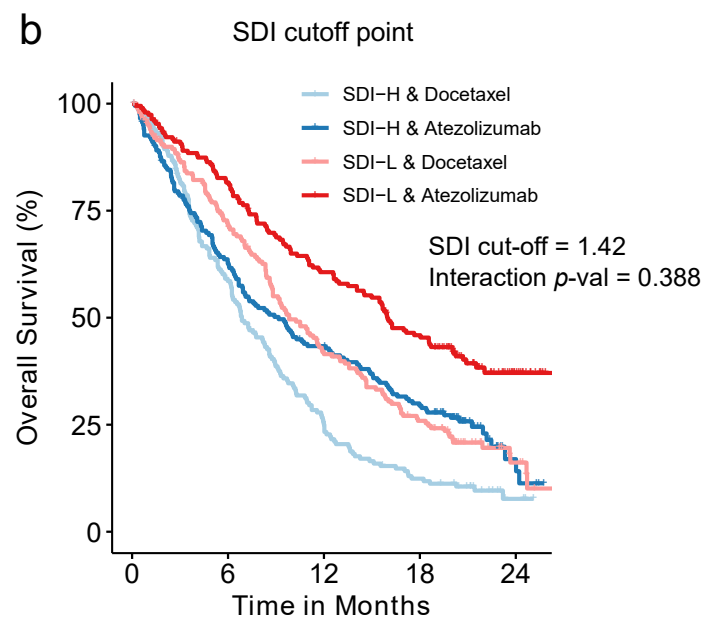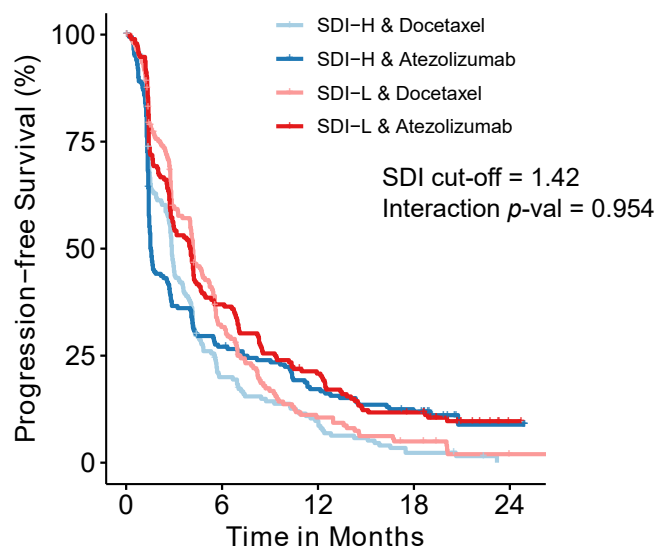

Number at risk

|     |     |     |    |    |
|-----|-----|-----|----|----|
| 190 | 107 | 44  | 21 | 3  |
| 202 | 122 | 82  | 55 | 6  |
| 201 | 135 | 76  | 45 | 9  |
| 192 | 154 | 112 | 83 | 15 |

Number at risk

|     |    |    |    |   |
|-----|----|----|----|---|
| 190 | 36 | 17 | 4  | 0 |
| 202 | 54 | 33 | 22 | 3 |
| 201 | 57 | 17 | 7  | 1 |
| 192 | 71 | 39 | 21 | 1 |

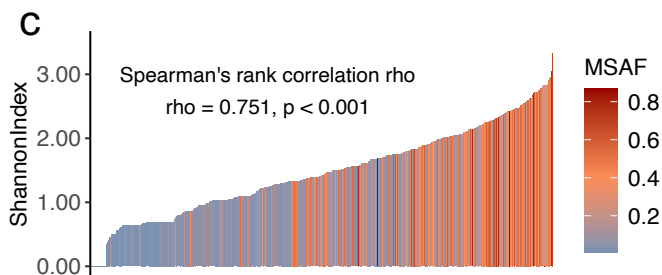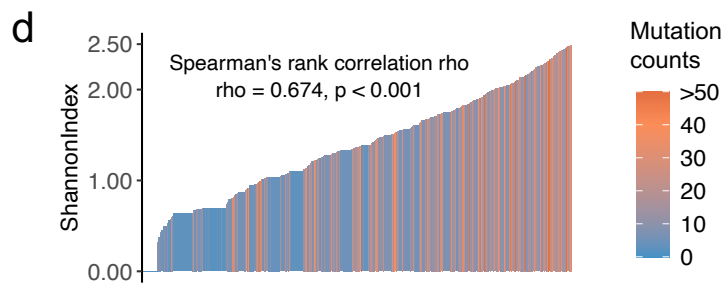

Supplement: mmc2.pdf [file mmc2.pdf]

**a**

POPLAR

*bITH* cutoff value 0.43 **0.50** 0.67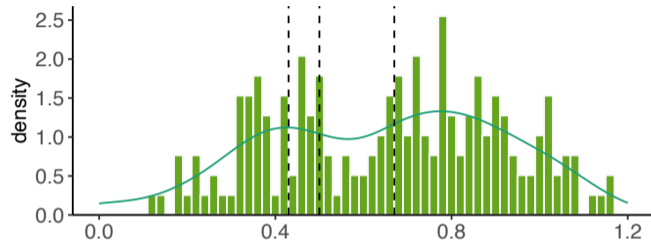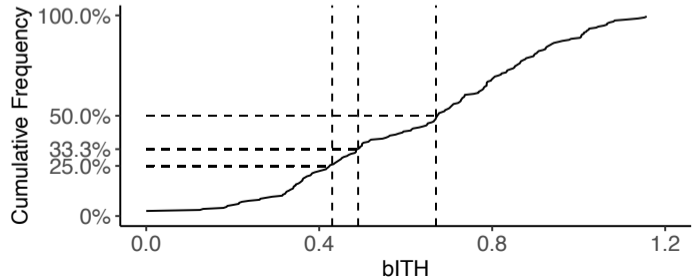**b**

OAK

*bITH* cutoff value 0.40 **0.45** 0.60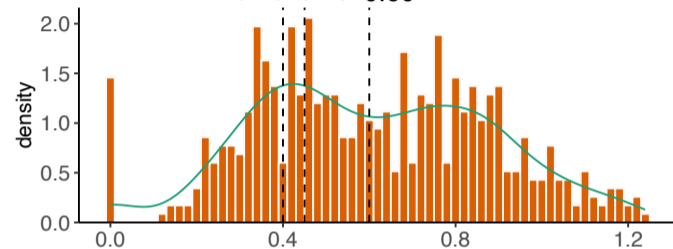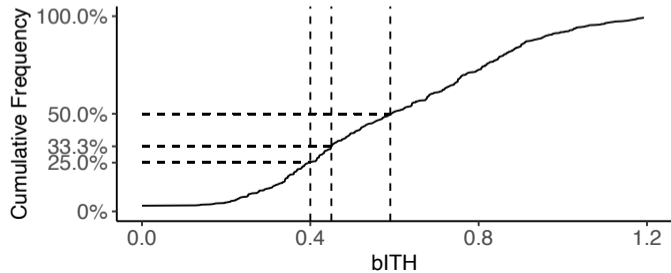

Supplement: mmc4.pdf [file mmc4.pdf]

**a**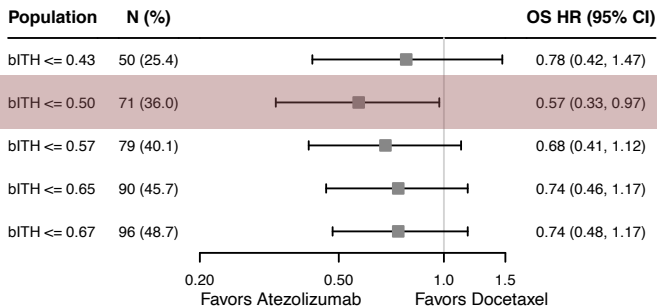**b**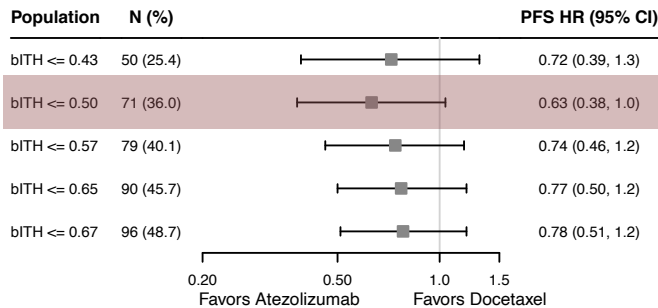**c**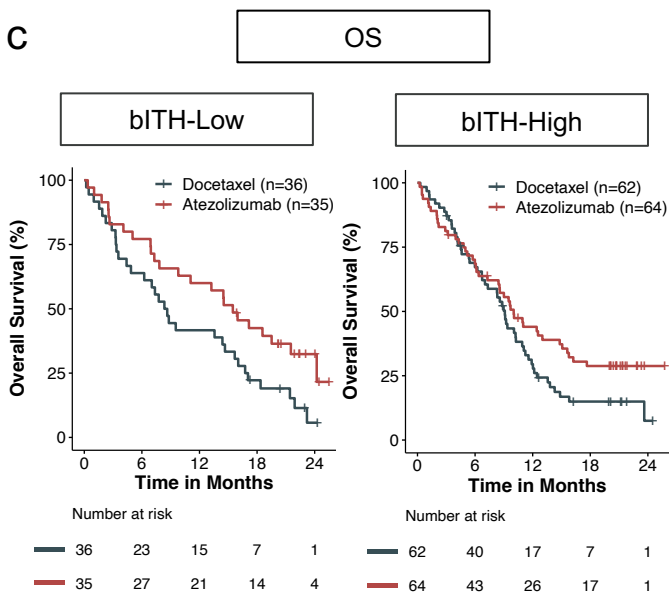**d**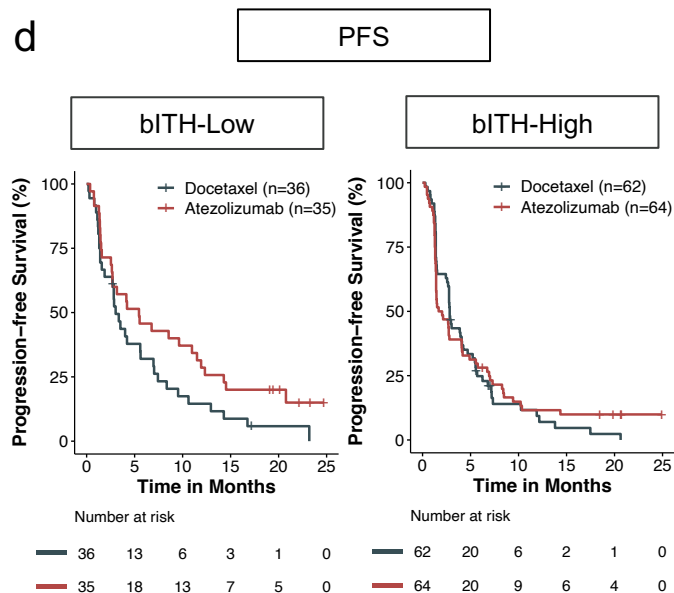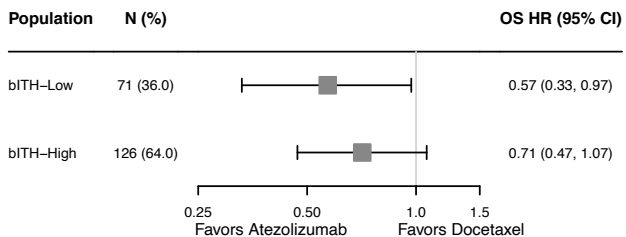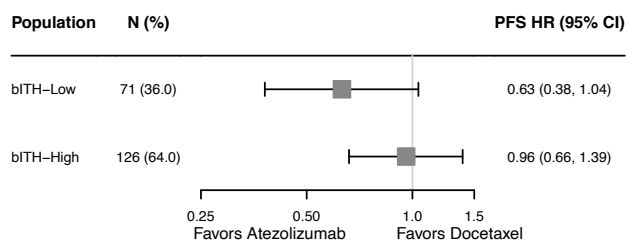

Supplement: mmc5.pdf [file mmc5.pdf]

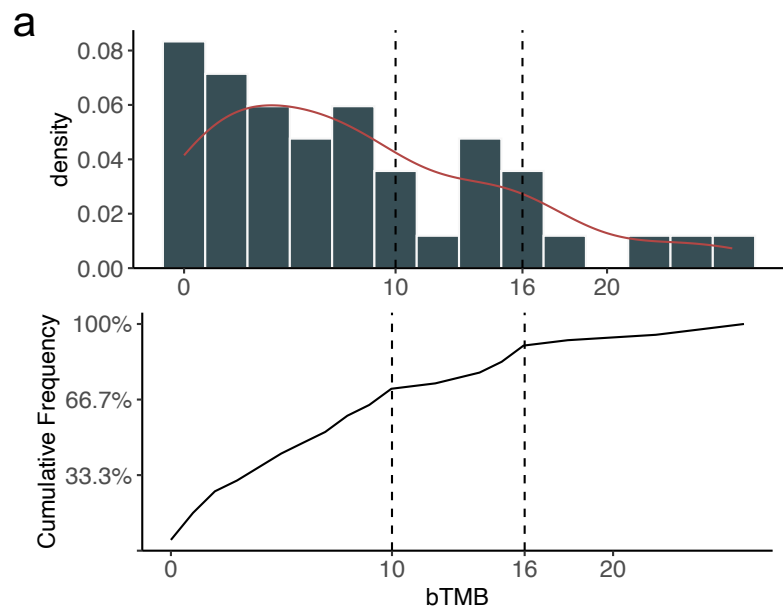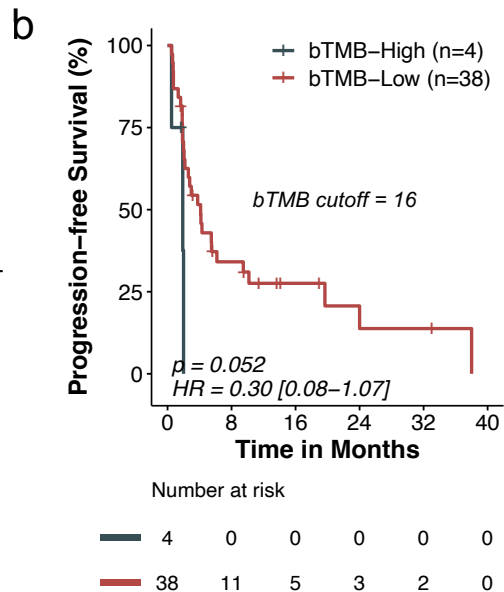

Supplement: mmc7.pdf [file mmc7.pdf]
